# Supplementary material
Source: PubMed Central journal article supplement (PMC6827203)
Supplement: NIHMS1054159-supplement-3.pdf [file NIHMS1054159-supplement-3.pdf]

## **Supporting Information: A Rapid Array-based Approach to N-glycan Profiling of Cultured Cells**

Peggi M. Angel<sup>1\*</sup>, Janet Saunders<sup>1</sup>, Cassandra L. Clift<sup>1</sup>, Shai White-Gilbertson<sup>2</sup>, Christina Voelkel-Johnson<sup>2</sup>, Elizabeth Yeh<sup>1</sup>, Anand Mehta<sup>1</sup>, Richard R. Drake<sup>1</sup>

1, Department of Cell and Molecular Pharmacology & Experimental Therapeutics, Medical University of South Carolina, Charleston, SC

2, Department of Microbiology and Immunology, Medical University of South Carolina, Charleston, SC

\*Corresponding Author: Peggi M. Angel, 173 Ashley Ave, BSB358, Charleston, SC 29425

Email: [angelp@musc.edu](mailto:angelp@musc.edu) Phone: [\(843\) 792-8410](tel:(843)792-8410) Fax: [\(843\) 792-0481](tel:(843)792-0481)

### **TABLE OF CONTENTS**

S-1: Supplemental Data 1, Cell Culture Methods

S-2: Supplemental Figure 1, Increased cell counts result in ion suppression

S-3: Supplemental Figure 2, PCR measurement of markers eNOS, COL1A1, TGF $\beta$  due to oxidative stress in human aortic endothelial cells.

S-4: Supplemental Table 1, Common N-glycans profiled in cell types.

S-5: Supplemental Table 2, N-glycan turnover increasing due to oxidative stress

## Supplemental Data 1

### Methods, Cell Culture

Cell Culture. Human Aortic Endothelial cells (HAEC). Male primary Human Aortic Endothelial Cells (ATCC, Manassas, VA) were grown according to manufacturer's protocols at 37°C under 5% CO<sub>2</sub>. Cells were passaged by Versene (Thermo Fisher) and scraping. Media (Vascular Basal Cell Medium, ATCC) was prepared with Endothelial Cell Growth Kit-BBE (ATCC, PCS-100-040), including 10 mL Fetal bovine serum (FBS) (10%). For <sup>15</sup>N labeling, L-glutamine (Amide-15N, 98%+, Cambridge Isotope Laboratories, Inc) was substituted for <sup>14</sup>N glutamine in complete media. Cells were plated into cell chambers and allowed to adhere overnight prior to mass spectrometry. For <sup>15</sup>N labeling under oxidative stress, cells were plated into cell chambers, allowed to adhere overnight, followed by cultivating for one week in <sup>15</sup>N media spiked with 50 μM H<sub>2</sub>O<sub>2</sub> or in <sup>15</sup>N media untreated. Media was changed daily.

The HepG2/C3A cells are a clonal derivative of HepG2 cells derived from HepG2 hepatoblastoma cells<sup>1</sup>. Cells were grown as previously described for HepG2.2.15 cells<sup>2</sup>. Briefly, Cells were grown in RPMI containing 10% fetal bovine serume, followed by washing and culturing in serum-free media for 24 hours prior to analysis.

Primary prostate adenocarcinoma (PPC1) cells were obtained from Dr. Dean Tang (Roswell Park Comprehensive Cancer Center, Buffalo, NY) and maintained in RPMI media (Cellgro, Manassas, VA) supplemented with 10% FBS (Hyclone, Logan, UT) and 1% penicillin/streptomycin (Gibco, Grand Island, NY). All tissue culture was done in a 5% CO<sub>2</sub> humidified incubator, and all cell lines were periodically verified to be free of mycoplasma with a MycoAlert PLUS kit (Lonza, Allendale, NJ). To generate Polynuclear Giant Cancer Cells (PGCCs), PPC1 cells were plated 8 X 10<sup>5</sup> on 100 mm plates and irradiated in a <sup>137</sup>Cs γ-irradiator (J.L Sheperd & Associates, An Fenrando, CA) to 8 Gy. Cells were then allowed to undergo endoreplication until PGCCs could be visually confirmed to be the majority of remaining adherent cells, typically about 48 hours. Irradiated cells were filtered using a 20 micrometer mesh (Pluriselect, San Diego, CA) to obtain a population further enriched in PGCCs. PPC1 cells and PGCCs were counted and plated onto chamber slides (Lab Tek II) and allowed to adhere overnight.

The 4T1 mouse mammary cells model stage IV human breast cancer cells (ATCC, Manassas, VA) were grown according to manufacturer's protocols at 37° C and 5% CO<sub>2</sub>. Media was composed of RPMI 1640 (Corning), 10% FBS (Gibco), 2mM Glutamine (Corning), and Pen/Strep (Corning).

### References

1. Sells, M. A.; Chen, M. L.; Acs, G., Production of hepatitis B virus particles in Hep G2 cells transfected with cloned hepatitis B virus DNA. *Proceedings of the National Academy of Sciences* **1987**, 84, (4), 1005-1009.
2. Norton, P. A.; Comunale, M. A.; Krakover, J.; Rodemich, L.; Pirog, N.; D'Amelio, A.; Philip, R.; Mehta, A. S.; Block, T. M., N-linked glycosylation of the liver cancer biomarker GP73. *Journal of Cellular Biochemistry* **2008**, 104, (1), 136-149.

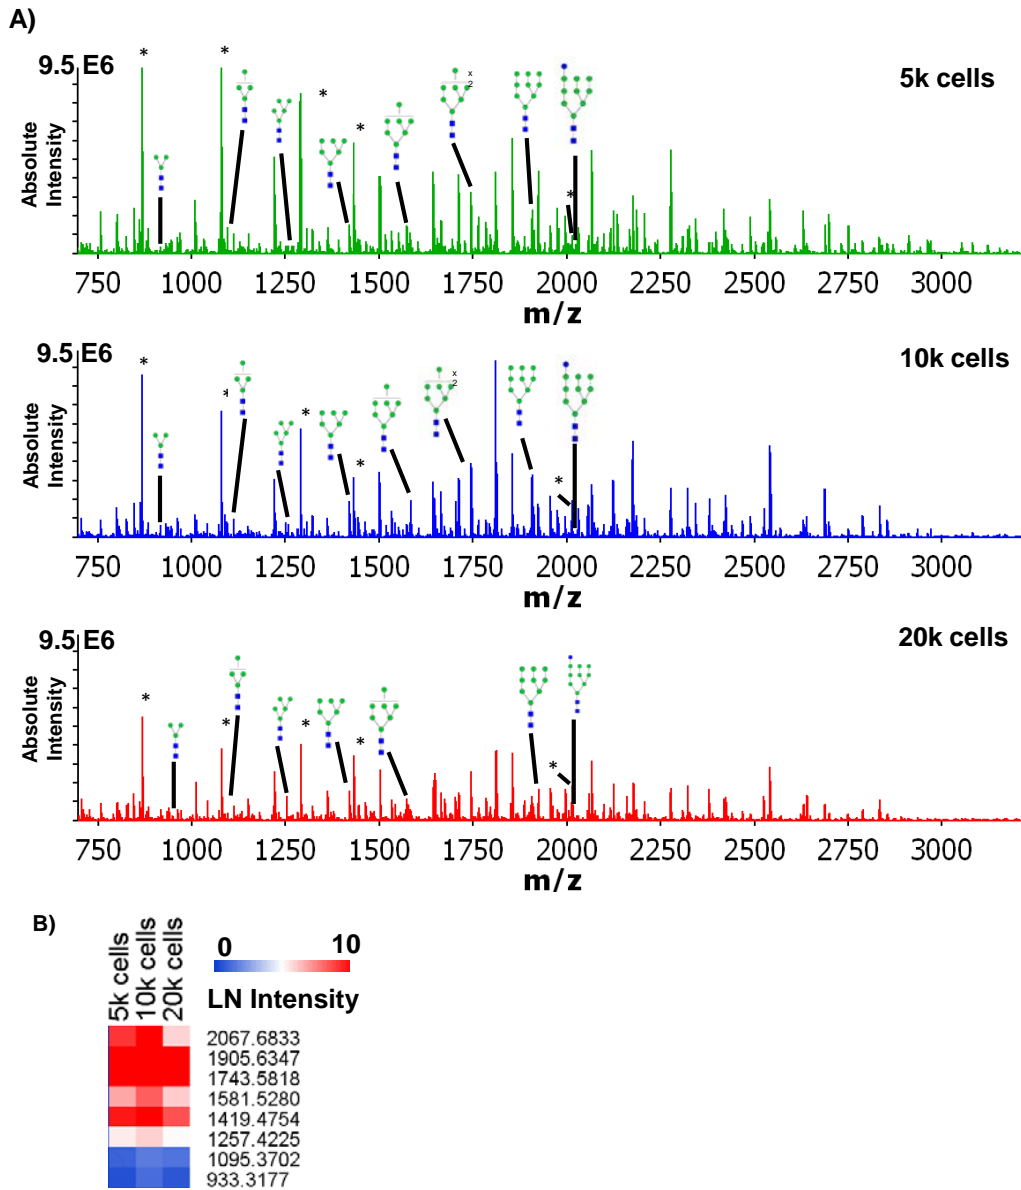

**Supplemental Figure 1.** Signal suppression at 20k cell counts per chamber for HAEC. A) Cell specific signal decreases as cell count increases, likely due to ion suppression. B) evaluation of mannose series by cell counts. At 20K cell counts, Man9, Man 7 and Man 6 are decreased. We report that cell counts should be determined per cell type.

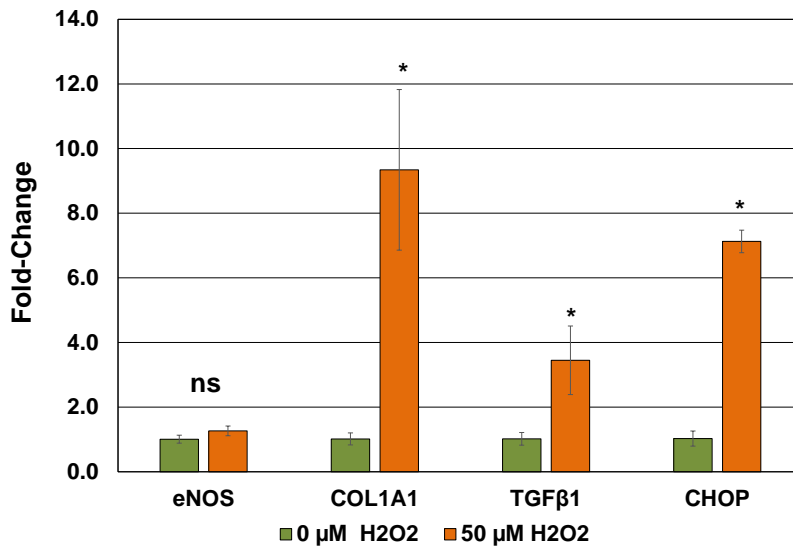

\*; t-test p-value ≤0.001

Supplemental Figure 2. In primary human aortic endothelial cells, unfolded protein response (CHOP) increases with potential activation of endothelial mesenchymal transition (TGFβ1, COL1A1) after 24 hours of oxidative stress (OS) treatment at 50 μM H<sub>2</sub>O<sub>2</sub> compared to untreated cells. Lack of significant change in eNOS demonstrates functional status of the endothelial cells is not affected by OS dosing.

Supplemental Table 1. Common N-glycans found in each cell type. Media contributions have been subtracted.

|                                     |                               | Relative intensity shown per cell line |              |           |          |        |      |       |      |
|-------------------------------------|-------------------------------|----------------------------------------|--------------|-----------|----------|--------|------|-------|------|
|                                     |                               | Lowest                                 | Intermediate | Highest   |          |        |      |       |      |
|                                     |                               | Theoretical                            | m/z +/-      |           |          |        |      |       |      |
| Name                                |                               | Mass                                   | 0.003%       | PPM       | HAEC     | HepC3A | 4T1  | PPC1  | PGCC |
| Mannose                             | Hex10HexNAc2 + 1Na            | 2067.6866                              | 2067.6872    | -3.0E-07  | 1.35     | 2.27   | 3.00 | 1.88  | 3.51 |
|                                     | Hex9HexNAc2 + 1Na             | 1905.6338                              | 1905.6323    | 7.9E-07   | 5.57     | 5.04   | 6.18 | 2.48  | 4.15 |
|                                     | Hex8HexNAc2 + 1Na             | 1743.5810                              | 1743.5840    | -1.7E-06  | 4.47     | 1.75   | 3.70 | 2.17  | 4.59 |
|                                     | Hex7HexNAc2 + 1Na             | 1581.5282                              | 1581.5331    | -3.1E-06  | 2.07     | 2.36   | 1.71 | 0.72  | 1.37 |
|                                     | Hex6HexNAc2 + 1Na             | 1419.4754                              | 1419.4792    | -2.7E-06  | 1.37     | 1.70   | 1.51 | 0.94  | 1.58 |
|                                     | Hex5HexNAc2 + 1Na             | 1257.4226                              | 1257.4240    | -1.1E-06  | 0.03     | 1.21   | 0.80 | 0.36  | 0.59 |
|                                     | Hex4HexNAc2 + 1Na             | 1095.3698                              | 1095.3704    | -5.5E-07  | 0.07     | 0.37   | 0.14 | 0.08  | 0.07 |
|                                     | Hex3HexNAc2 + 1Na             | 933.3170                               | 933.3176     | -6.4E-07  | 0.06     | 0.37   | 0.11 | 0.03  | 0.04 |
|                                     | Hex2HexNAc2 + 1Na             | 771.2642                               | 771.2652     | -1.2E-06  | 0.02     | 0.18   | 0.07 | 0.01  | 0.02 |
|                                     | Bi-, Tri- Tetra,<br>No Fucose | Hex3HexNAc3 + 1Na                      | 1136.3964    | 1136.3990 | -2.2E-06 | 0.00   | 0.66 | 0.21  | 0.24 |
| Hex4HexNAc3 + 1Na                   |                               | 1298.4492                              | 1298.4504    | -9.5E-07  | 0.01     | 1.47   | 0.37 | 0.60  | 0.47 |
| Hex5HexNAc3 + 1Na                   |                               | 1460.5020                              | 1460.5063    | -2.9E-06  | 0.09     | 1.08   | 0.64 | 0.24  | 0.31 |
| Hex4HexNAc4 + 1Na                   |                               | 1501.5286                              | 1501.5316    | -2.0E-06  | 0.00     | 0.72   | 0.46 | 0.27  | 0.24 |
| Hex3HexNAc5 + 1Na                   |                               | 1542.5552                              | 1542.5542    | 6.5E-07   | 0.03     | 2.49   | 0.16 | 0.04  | 0.07 |
| Hex5HexNAc4 + 1Na                   |                               | 1663.5814                              | 1663.5843    | -1.7E-06  | 0.00     | 7.54   | 2.47 | 6.15  | 5.61 |
| Hex4HexNAc5 + 1Na                   |                               | 1704.6080                              | 1704.6107    | -1.6E-06  | 0.10     | 1.80   | 0.36 | 0.04  | 0.08 |
| Hex5HexNAc5 + 1Na                   |                               | 1866.6608                              | 1866.6630    | -1.2E-06  | 0.00     | 2.04   | 0.77 | 0.78  | 0.71 |
| Hex6HexNAc5 + 1Na                   |                               | 2028.7136                              | 2028.7109    | 1.3E-06   | 0.00     | 12.41  | 0.21 | 14.69 | 0.00 |
| Hex3HexNAc6 + 1Na                   |                               | 1745.6345                              | 1745.6374    | -1.6E-06  | 0.38     | 2.12   | 0.43 | 0.13  | 0.23 |
| Hex5HexNAc6 + 1Na                   | 2069.7402                     | 2069.7372                              | 1.5E-06      | 0.32      | 1.37     | 0.78   | 0.19 | 0.34  |      |
| Bi-, Tri- Tetra,<br>With Fucose     | Hex3dHex1HexNAc2 + 1Na        | 1079.3749                              | 1079.3725    | 2.2E-06   | 0.05     | 0.33   | 0.13 | 0.04  | 0.08 |
|                                     | Hex4dHex1HexNAc2 + 1Na        | 1241.4277                              | 1241.4263    | 1.2E-06   | 0.03     | 0.17   | 0.20 | 0.04  | 0.06 |
|                                     | Hex3dHex1HexNAc3 + 1Na        | 1282.4543                              | 1282.4530    | 1.1E-06   | 0.28     | 0.41   | 0.26 | 0.15  | 0.29 |
|                                     | Hex4dHex1HexNAc3 + 1Na        | 1444.5071                              | 1444.5062    | 6.2E-07   | 1.08     | 0.72   | 0.82 | 0.41  | 0.58 |
|                                     | Hex3dHex1HexNAc4 + 1Na        | 1485.5337                              | 1485.5340    | -1.9E-07  | 0.16     | 0.58   | 0.54 | 0.23  | 1.03 |
|                                     | Hex4dHex1HexNAc4 + 1Na        | 1647.5865                              | 1647.5915    | -3.0E-06  | 1.73     | 1.05   | 1.71 | 1.13  | 1.67 |
|                                     | Hex3dHex1HexNAc5 + 1Na        | 1688.6131                              | 1688.6136    | -3.0E-07  | 0.14     | 0.64   | 0.60 | 0.18  | 0.60 |
|                                     | Hex5dHex1HexNAc4 + 1Na        | 1809.6393                              | 1809.6430    | -2.1E-06  | 12.62    | 2.45   | 3.35 | 3.49  | 5.05 |
|                                     | Hex4dHex1HexNAc5 + 1Na        | 1850.6659                              | 1850.6687    | -1.5E-06  | 0.10     | 2.68   | 1.52 | 0.37  | 0.90 |
|                                     | Hex3dHex1HexNAc6 + 1Na        | 1891.6925                              | 1891.6932    | -3.5E-07  | 0.10     | 1.23   | 1.55 | 0.14  | 0.37 |
|                                     | Hex5dHex2HexNAc4 + 1Na        | 1955.6972                              | 1955.6921    | 2.6E-06   | 3.22     | 0.70   | 1.44 | 1.20  | 1.75 |
|                                     | Hex5dHex1HexNAc5 + 1Na        | 2012.7187                              | 2012.7224    | -1.8E-06  | 1.24     | 1.47   | 2.55 | 2.17  | 2.50 |
|                                     | Hex5dHex3HexNAc4 + 1Na        | 2101.7551                              | 2101.7515    | 1.7E-06   | 1.44     | 1.54   | 0.88 | 0.30  | 0.43 |
|                                     | Hex5dHex2HexNAc5 + 1Na        | 2158.7766                              | 2158.7786    | -9.3E-07  | 0.77     | 0.63   | 1.13 | 1.95  | 1.48 |
|                                     | Hex6dHex1HexNAc5 + 1Na        | 2174.7715                              | 2174.7715    | -5.1E-09  | 6.71     | 1.07   | 2.96 | 2.04  | 3.24 |
|                                     | Hex5dHex2HexNAc6 + 1Na        | 2361.8560                              | 2361.8520    | 1.7E-06   | 0.04     | 0.38   | 0.44 | 0.12  | 0.20 |
|                                     | Hex6dHex1HexNAc6 + 1Na        | 2377.8509                              | 2377.8472    | 1.6E-06   | 2.31     | 0.04   | 1.75 | 0.38  | 0.78 |
|                                     | Hex6dHex3HexNAc5 + 1Na        | 2465.8669                              | 2465.8590    | 3.2E-06   | 2.51     | 1.40   | 0.80 | 0.12  | 0.31 |
|                                     | Hex7dHex1HexNAc6 + 1Na        | 2539.9037                              | 2539.9037    | -4.3E-09  | 16.10    | 0.04   | 4.75 | 3.06  | 4.99 |
|                                     | Hex7dHex2HexNAc6 + 1Na        | 2685.9616                              | 2685.9644    | -1.0E-06  | 6.23     | 0.52   | 1.02 | 0.00  | 0.00 |
| Hex7dHex1HexNAc7 + 1Na              | 2742.9831                     | 2742.9768                              | 2.3E-06      | 0.00      | 0.36     | 0.23   | 0.00 | 0.00  |      |
| Hex7dHex3HexNAc6 + 1Na              | 2832.0195                     | 2832.0158                              | 1.3E-06      | 2.03      | 1.20     | 0.53   | 0.01 | 0.00  |      |
| Hex8dHex1HexNAc7 + 1Na              | 2905.0359                     | 2905.0437                              | -2.7E-06     | 0.76      | 0.55     | 1.19   | 0.28 | 0.15  |      |
| Hex9dHex1HexNAc8 + 1Na              | 3270.1681                     | 3270.1643                              | 1.2E-06      | 0.00      | 1.28     | 0.78   | 0.00 | 0.10  |      |
| Sialic acid<br>containing N-glycans | Hex2dHex1HexNAc3NeuAc1 + 2Na  | 1433.4867                              | 1433.4907    | -2.8E-06  | 0.04     | 0.17   | 0.17 | 0.00  | 0.00 |
|                                     | Hex5HexNAc3NeuAc1 + 1Na       | 1913.6503                              | 1913.7137    | -3.3E-05  | 0.00     | 0.24   | 0.61 | 1.01  | 0.74 |
|                                     | Hex4dHex1HexNAc4NeuAc1 + 1Na  | 1938.6819                              | 1938.6814    | 2.4E-07   | 0.15     | 0.93   | 1.04 | 1.27  | 1.04 |
|                                     | Hex5HexNAc4NeuAc1 + 1Na       | 1954.6768                              | 1954.6826    | -3.0E-06  | 0.27     | 1.09   | 0.65 | 0.32  | 0.28 |
|                                     | Hex5HexNAc4NeuAc1 + 2Na       | 1976.6666                              | 1976.6703    | -1.9E-06  | 0.00     | 0.53   | 1.94 | 4.29  | 3.21 |
|                                     | Hex5dHex1HexNAc4NeuAc1 + 1Na  | 2100.7347                              | 2100.7309    | 1.8E-06   | 2.38     | 1.67   | 1.53 | 0.80  | 1.10 |
|                                     | Hex5dHex1HexNAc4NeuAc1 + 2Na  | 2122.7245                              | 2122.7221    | 1.1E-06   | 5.17     | 0.97   | 1.09 | 0.69  | 0.94 |
|                                     | Hex4dHex1HexNAc5NeuAc1 + 1Na  | 2141.7613                              | 2141.7622    | -4.0E-07  | 0.00     | 1.62   | 1.48 | 2.13  | 1.48 |
|                                     | Hex5HexNAc4NeuAc2 + 1Na       | 2245.7722                              | 2245.7706    | 7.3E-07   | 0.00     | 0.13   | 0.87 | 0.23  | 0.17 |
|                                     | Hex5dHex2HexNAc4NeuAc1 + 2Na  | 2268.7824                              | 2268.7875    | -2.3E-06  | 1.39     | 1.99   | 1.64 | 0.54  | 0.59 |
|                                     | Hex4dHex2HexNAc5NeuAc1 + 1Na  | 2287.8192                              | 2287.8258    | -2.9E-06  | 0.71     | 1.22   | 1.43 | 0.25  | 0.29 |
|                                     | Hex5dHex1HexNAc5NeuAc1 + 1Na  | 2303.8141                              | 2303.8074    | 2.9E-06   | 0.07     | 0.70   | 0.54 | 0.71  | 0.18 |
|                                     | Hex6HexNAc5NeuAc1 + 1Na       | 2319.8090                              | 2319.8065    | 1.1E-06   | 0.44     | 2.99   | 1.97 | 5.14  | 3.71 |
|                                     | Hex5dHex1HexNAc5NeuAc1 + 2Na  | 2325.8039                              | 2325.8036    | 1.1E-07   | 0.07     | 0.34   | 0.56 | 0.26  | 0.24 |
|                                     | Hex6HexNAc5NeuAc1 + 2Na       | 2341.7988                              | 2341.7938    | 2.1E-06   | 0.00     | 1.44   | 3.39 | 11.64 | 6.46 |
|                                     | Hex5dHex1HexNAc4NeuAc2 + 1Na  | 2391.8301                              | 2391.8358    | -2.4E-06  | 0.00     | 1.00   | 2.64 | 1.58  | 1.68 |
|                                     | Hex7HexNAc6 + 1Na             | 2393.8458                              | 2393.8457    | 2.9E-08   | 1.90     | 0.04   | 3.15 | 0.91  | 1.28 |
|                                     | Hex5dHex2HexNAc5NeuAc1 + 2Na  | 2471.8618                              | 2471.8573    | 1.8E-06   | 0.10     | 0.41   | 0.86 | 0.54  | 0.48 |
|                                     | Hex6HexNAc5NeuAc2 + 2Na       | 2632.8942                              | 2632.8885    | 2.1E-06   | 0.00     | 0.87   | 1.24 | 3.16  | 1.32 |
|                                     | Hex6HexNAc6NeuAc2 + 2Na       | 2835.9736                              | 2835.9790    | -1.9E-06  | 4.26     | 0.33   | 0.80 | 0.00  | 0.09 |
|                                     | Hex6HexNAc5NeuAc3 + 1Na       | 2901.9998                              | 2901.9935    | 2.2E-06   | 0.00     | 0.42   | 2.94 | 2.15  | 1.02 |
|                                     | Hex6HexNAc5NeuAc3 + 2Na       | 2923.9896                              | 2923.9941    | -1.5E-06  | 0.00     | 0.75   | 4.29 | 1.79  | 0.61 |
|                                     | Hex7dHex3HexNAc6NeuAc1 + 2Na  | 3145.1047                              | 3145.1127    | -2.5E-06  | 0.80     | 1.84   | 0.99 | 0.06  | 0.23 |
|                                     | Hex7dHex2HexNAc7NeuAc1 + 1Na  | 3180.1364                              | 3180.1355    | 2.8E-07   | 0.00     | 1.12   | 2.12 | 0.02  | 0.00 |
|                                     | Hex7dHex2HexNAc6NeuAc2 + 1Na  | 3268.1524                              | 3268.1560    | -1.1E-06  | 0.00     | 1.28   | 1.19 | 0.00  | 0.00 |
|                                     | Hex7dHex2HexNAc6NeuAc2 + 2Na  | 3290.1422                              | 3290.1414    | 2.4E-07   | 0.00     | 0.51   | 0.64 | 0.07  | 0.01 |

**Supplemental Table 2:** Comparison of <sup>15</sup>N incorporation between untreated cells and treated cells. N-glycans are represented by composition. Peak data is intensity data.

| Composition                  | No. <sup>15</sup> N Labels | Theor. m/z | Observed m/z | PPM      | Untreated |       |      | Treated 50 $\mu$ M H <sub>2</sub> O <sub>2</sub> |        |      | Treat / Untreated |          |
|------------------------------|----------------------------|------------|--------------|----------|-----------|-------|------|--------------------------------------------------|--------|------|-------------------|----------|
|                              |                            |            |              |          | AVG       | STDEV | %CV  | AVG                                              | STDEV  | %CV  | Ratio             | p-value  |
| Hex6HexNAc2 + 1Na            | 2                          | 1421.4695  | 1421.4694    | 1.1E-07  | 16338     | 2536  | 15.5 | 56718                                            | 8145   | 14.4 | 3.47              | 3.94E-08 |
| Hex4dHex1HexNAc3 + 1Na       | 3                          | 1447.4982  | 1447.4960    | 1.5E-06  | 22477     | 2288  | 10.2 | 37080                                            | 8299   | 22.4 | 1.65              | 9.75E-04 |
| Hex7HexNAc2 + 1Na            | 2                          | 1583.5223  | 1583.5328    | -6.6E-06 | 25911     | 2649  | 10.2 | 63877                                            | 9740   | 15.2 | 2.47              | 9.35E-07 |
| Hex4dHex1HexNAc4 + 1Na       | 4                          | 1651.5746  | 1651.5754    | -4.8E-07 | 18558     | 2361  | 12.7 | 41946                                            | 7891   | 18.8 | 2.26              | 6.96E-06 |
| Hex5HexNAc4 + 1Na            | 4                          | 1667.5695  | 1667.5684    | 6.6E-07  | 46398     | 3761  | 8.1  | 88646                                            | 14911  | 16.8 | 1.91              | 1.71E-05 |
| Hex8HexNAc2 + 1Na            | 2                          | 1745.5751  | 1745.5798    | -2.7E-06 | 22351     | 2629  | 11.8 | 60933                                            | 7198   | 11.8 | 2.73              | 1.51E-08 |
| Hex5dHex1HexNAc4 + 1Na       | 4                          | 1813.6274  | 1813.6224    | 2.8E-06  | 166742    | 16243 | 9.7  | 546409                                           | 108570 | 19.9 | 3.28              | 1.01E-06 |
| Hex9HexNAc2 + 1Na            | 2                          | 1907.6279  | 1907.6234    | 2.4E-06  | 57948     | 6973  | 12.0 | 122544                                           | 11775  | 9.6  | 2.11              | 1.03E-07 |
| Hex6HexNAc5 + 1Na            | 5                          | 2033.6988  | 2033.6969    | 9.3E-07  | 9937      | 810   | 8.1  | 30094                                            | 4356   | 14.5 | 3.03              | 4.72E-08 |
| Hex5dHex1HexNAc4NeuAc1 + 2Na | 5                          | 2127.7096  | 2127.7147    | -2.4E-06 | 34826     | 3650  | 10.5 | 58041                                            | 10673  | 18.4 | 1.67              | 3.90E-04 |
| Hex6dHex1HexNAc5 + 1Na       | 5                          | 2179.7567  | 2179.7615    | -2.2E-06 | 34716     | 3083  | 8.9  | 236240                                           | 30561  | 12.9 | 6.80              | 7.80E-10 |
| Hex6dHex1HexNAc5NeuAc1 + 2Na | 6                          | 2493.8389  | 2493.8459    | -2.8E-06 | 26443     | 3646  | 13.8 | 53449                                            | 8185   | 15.3 | 2.02              | 6.59E-06 |
